# Supplementary material for: A novel multimode sensor showing cation-dependent fluorescence colour
Source: Royal Society of Chemistry journal article supplement (doi:10.1039/c7cp05734b), 2017-01-01
Supplement: c7cp05734b1.pdf [file c7cp05734b1.pdf]

*Supplementary Information*

## A Novel Multimode Sensor Showing Cation-Dependent Fluorescence Colour

*Sho Fujii,<sup>a, b</sup> Ryo Ishimura,<sup>a</sup> Atsushi Nakagawa,<sup>a</sup> and Noboru Kitamura<sup>\*a, b</sup>*

<sup>a</sup> Department of Chemistry, Faculty of Science, Hokkaido University, Kita-10, Nishi-8, Kita-ku, Sapporo, 060-0810, Japan.

<sup>b</sup> Graduate School of Chemical Sciences and Engineering, Hokkaido University, Kita-10, Nishi-8, Kita-ku, Sapporo, 060-0810

\*E-mail: [kitamura@sci.hokudai.ac.jp](mailto:kitamura@sci.hokudai.ac.jp)

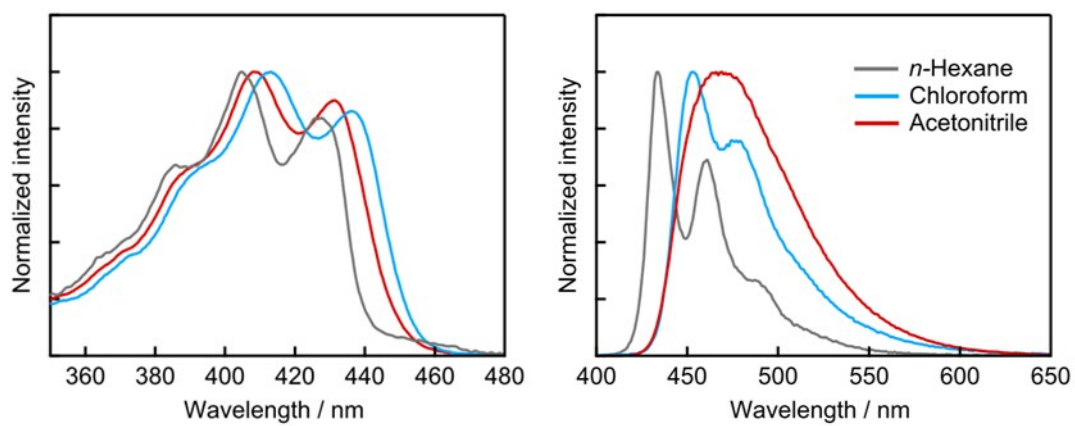

**Figure S1.** Absorption (left) and fluorescence (right) spectra of compound **1** in *n*-hexane ( $\epsilon_r = 2.0$ ), chloroform (4.8), and acetonitrile (37).  $\epsilon_r$  is the dielectric constant of the solvent.

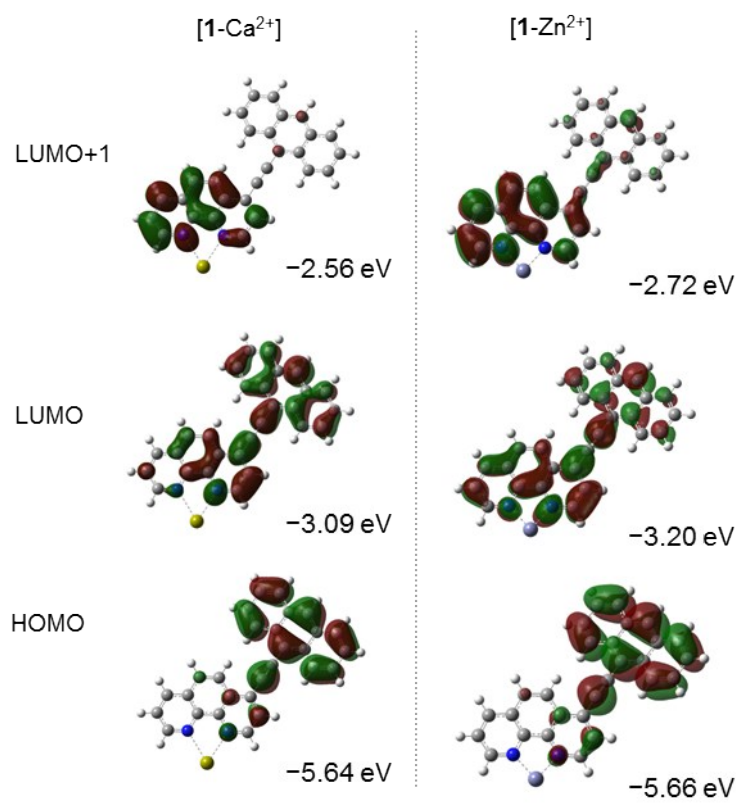

**Figure S2.** Electron densities in the HOMO, LUMO, and LUMO+1 levels of the [1-Ca<sup>2+</sup>] and [1-Zn<sup>2+</sup>] complexes evaluated by DFT calculations (B3LYP/6-31G(d, p)).

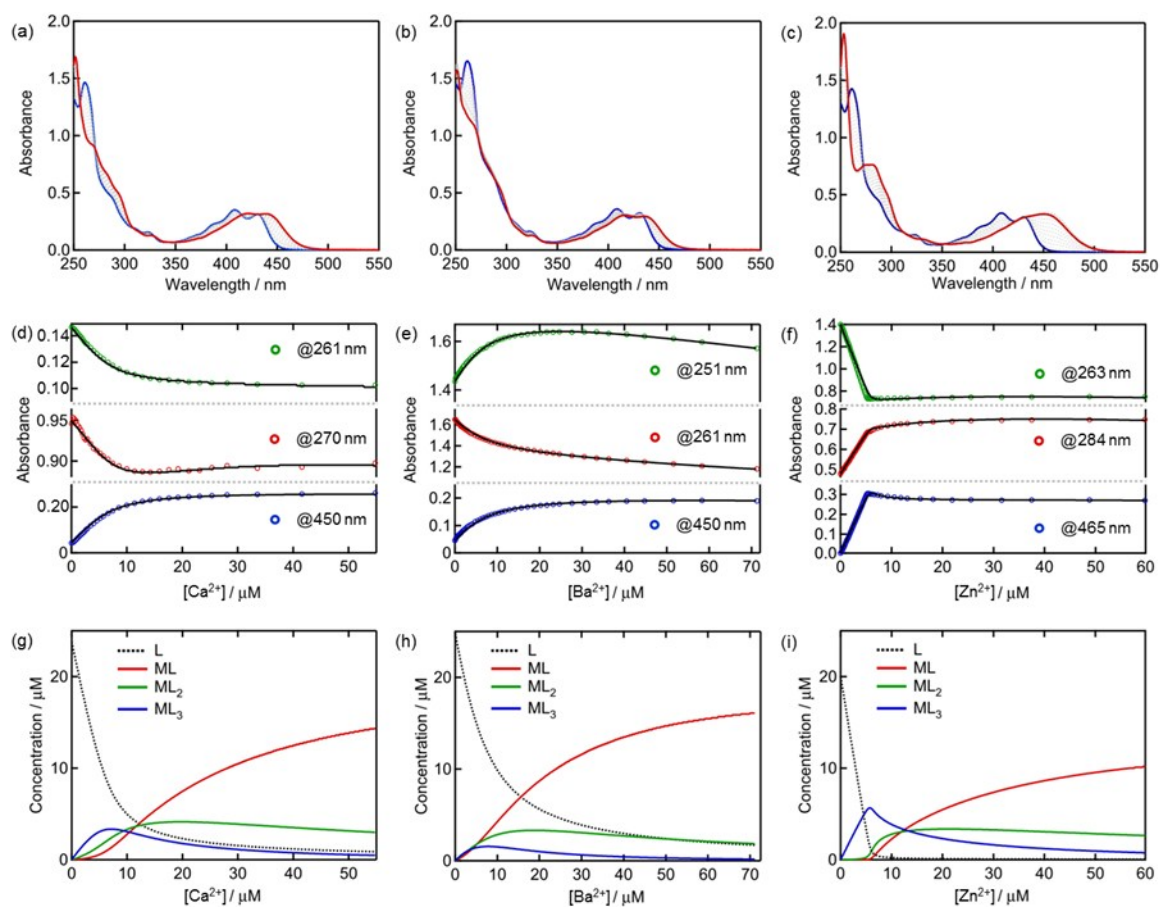

**Figure S3.** (a, b, c) UV-vis absorption spectra of **1** upon titration by (a)  $\text{Ca}^{2+}$  ( $[\mathbf{1}] = 2.4 \times 10^{-6} \text{ M}$ ), (b)  $\text{Ba}^{2+}$  ( $[\mathbf{1}] = 2.5 \times 10^{-6} \text{ M}$ ), and (c)  $\text{Zn}^{2+}$  ( $[\mathbf{1}] = 2.0 \times 10^{-6} \text{ M}$ ) in acetonitrile. The blue and red curves show the spectra of **1** before and after  $(6.0 \sim 7.0) \times 10^{-6} \text{ M}$  an addition of  $\text{M}^{2+}$ , respectively. (d, e, f) Titration curves monitored at several wavelengths (open circles) and their simulated curves (solid curves). (g, h, i) Concentration changes of [L], [ML], [ML<sub>2</sub>], and [ML<sub>3</sub>] during titration evaluated by spectral analysis.

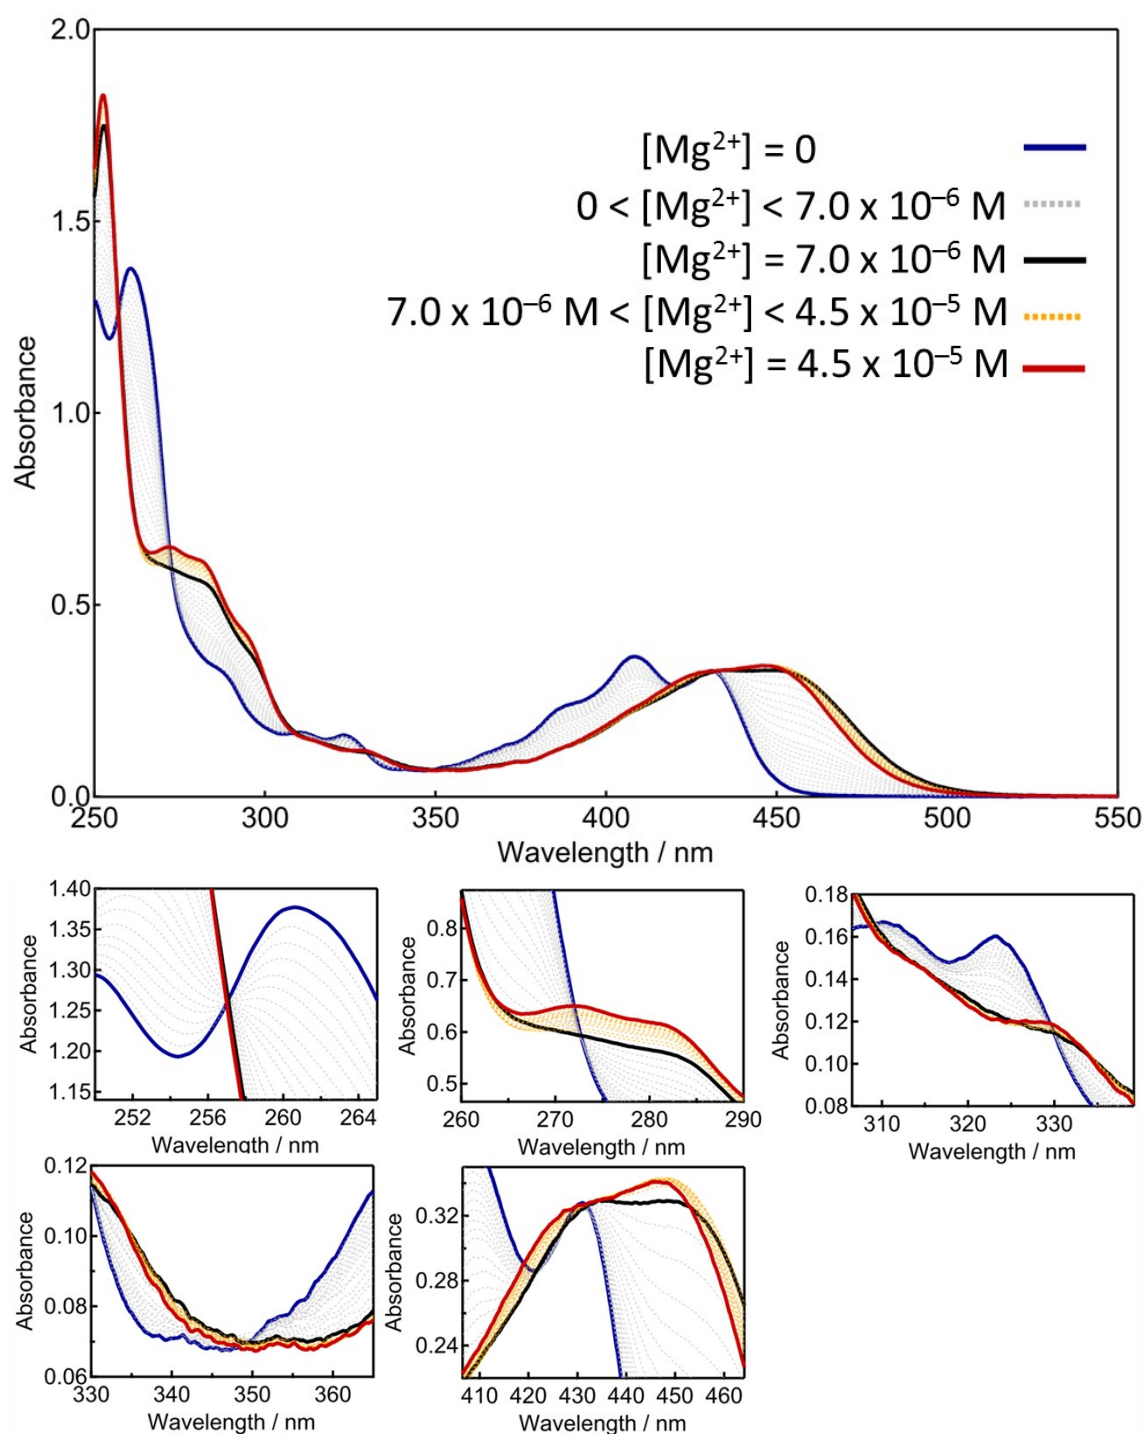

**Figure S4.** Enlarged view of Fig.2a: UV-vis absorption spectra of **1** ( $2.1 \times 10^{-6}$  M) upon titration by  $\text{MgClO}_4$  in acetonitrile. Spectral changes around the isosbestic points (257, 273, 309, 330, 349, 424, and 433 nm) are also enlarged. The seven sharp isosbestic points were observed at  $[\text{Mg}^{2+}] < 7.0 \times 10^{-6}$  M. The isosbestic points except for those at 257 and 433 nm shifted to shorter wavelength with increasing in  $[\text{Mg}^{2+}]$ . These data manifest the present system is a multi-component system.

**Table S1.** Molar absorption coefficients ( $\epsilon_{\lambda} / 10^4 \text{ M}^{-1}\text{cm}^{-1}$ ) of the  $[\mathbf{1} - \text{M}^{2+}]$  complexes evaluated by the analysis of the titration curves in Figs. 5 and S3.

|                         | $\text{Mg}^{2+}$ |           |           | $\text{Ca}^{2+}$ |           |           | $\text{Ba}^{2+}$ |           |           | $\text{Zn}^{2+}$ |           |           |
|-------------------------|------------------|-----------|-----------|------------------|-----------|-----------|------------------|-----------|-----------|------------------|-----------|-----------|
|                         | 270<br>nm        | 273<br>nm | 470<br>nm | 261<br>nm        | 270<br>nm | 450<br>nm | 251<br>nm        | 261<br>nm | 450<br>nm | 263<br>nm        | 284<br>nm | 465<br>nm |
| $\epsilon_{\text{L}}$   | 3.97             | 2.74      | 0.0123    | 6.14             | 3.97      | 0.181     | 5.79             | 6.64      | 0.181     | 7.00             | 2.40      | 0.0187    |
| $\epsilon_{\text{ML}}$  | 3.29             | 3.31      | 0.751     | 4.65             | 4.23      | 1.25      | 7.40             | 5.13      | 0.997     | 4.59             | 4.65      | 1.78      |
| $\epsilon_{\text{ML}2}$ | 5.72             | 5.76      | 1.81      | 7.68             | 6.65      | 2.23      | 13.4             | 11.3      | 1.26      | 6.90             | 6.79      | 1.80      |
| $\epsilon_{\text{ML}3}$ | 8.16             | 8.24      | 3.28      | 14.0             | 11.5      | 2.93      | 16.8             | 18.9      | 1.8       | 10.8             | 10.9      | 5.17      |
